# Comprehensive gene expression profile of human activated T<sub>h</sub>1- and T<sub>h</sub>2-polarized cells

Shigenori Nagai, Shin-ichi Hashimoto, Taro Yamashita, Nobuaki Toyoda, Taku Satoh, Takuji Suzuki and Kouji Matsushima

Department of Molecular Preventive Medicine, School of Medicine and CREST, University of Tokyo, 7-3-1 Hongo, Bunkyo-ku, Tokyo 113-0033, Japan

**Keywords:** chemokine, cytokine, serial analysis of gene expression, T<sub>h</sub>, transcripts

## Abstract

In response to antigen stimulation, T<sub>h</sub> cells differentiate into two types of effector cells, T<sub>h</sub>1 and T<sub>h</sub>2. T<sub>h</sub>1 cells predominantly mediate cellular immunity, whereas T<sub>h</sub>2 cells induce humoral allergic responses. We have conducted here serial analysis of gene expression (SAGE) in human activated T<sub>h</sub>1- and T<sub>h</sub>2-polarized cells from cord blood. SAGE analysis of 64,510 tags (32,219 and 32,291 tags from T<sub>h</sub>1 and T<sub>h</sub>2 cells respectively) allowed identification of 22,096 different transcripts. In activated T<sub>h</sub>1 cells, many of the known genes (12 genes,  $P < 0.01$ ; 56 genes,  $P < 0.05$ ), including genes encoding IFN- $\gamma$ , lymphotactin, osteopontin, MIP-1 $\alpha$ , MIP-1 $\beta$ , perforin,  $\beta$ -catenin and CD55, are highly expressed. On the other hand, in activated T<sub>h</sub>2 cells rather limited numbers of known genes (four genes,  $P < 0.01$ ; 10 genes;  $P < 0.05$ ), such as genes encoding FUS, ILF-2, IL-13 and E2-EPF, are found to be selectively expressed. The comprehensive identification of genes selectively expressed in human activated T<sub>h</sub>1 or T<sub>h</sub>2 cells should contribute to our understanding of the molecular basis of T<sub>h</sub>1/T<sub>h</sub>2-dominated human diseases and may provide genetic information to diagnose these diseases.

## Introduction

T<sub>h</sub> lymphocytes are classified into two subsets based on their cytokine production profile (1). T<sub>h</sub>1 cells produce a large amount of IFN- $\gamma$ , whereas T<sub>h</sub>2 cells produce IL-4, IL-5, IL-10 and IL-13. Development of T<sub>h</sub>1 cells is driven by IL-12 produced by macrophages and dendritic cells via the transcription factor Stat4 signaling. On the other hand, commitment to the T<sub>h</sub>2 lineage is induced by IL-4 via the Stat6 signaling pathway. T<sub>h</sub>1 cells mediate delayed-type hypersensitivity responses, and provide protection against intracellular pathogens and viruses, whereas T<sub>h</sub>2 cells promote B cells to produce IgE and contribute to the eradication of extracellular parasites, but also induce atopic reaction.

Significant progress has been made in identifying transcription factors that control the transition of naive T cells to the T<sub>h</sub>1 or T<sub>h</sub>2 lineage. c-Maf induces endogenous IL-4 production in non-T lineage cells (2) and GATA-3 promotes the expression of a broad spectrum of T<sub>h</sub>2-specific cytokines, even in developing and committed T<sub>h</sub>1 cells (3). In contrast, T-bet, which is one of the T-box family of transcription factors, has been recently identified as a key molecule in T<sub>h</sub>1 differentiation, which converts even committed T<sub>h</sub>2 cells into T<sub>h</sub>1 cells (4).

Furthermore, hematopoietic prostaglandin D synthase,

which is well known as a key enzyme involved in prostanoid production by allergen-provoked mast cells, is preferentially produced in T<sub>h</sub>2 clones (5) and chemoattractant receptor CRT2 is selectively expressed on the cell surface of T<sub>h</sub>2 cells (6). In contrast, the ligands of E-selectin and P-selectin are selectively expressed on the surface of T<sub>h</sub>1 cells (7).

With regard to chemokine receptors, CXCR3 and CCR5 are preferentially expressed on human T<sub>h</sub>1 cells. On the other hand, CCR4 is preferentially expressed on T<sub>h</sub>2 cells (8,9). The differential expression of chemokine receptors on each type of T<sub>h</sub> cell is thought to be critical to the selective cell migration of these cells into the particular immune/inflammatory sites. CCR5<sup>+</sup> CD4<sup>+</sup> T cells of the T<sub>h</sub>1 phenotype selectively accumulate in inflamed joints of rheumatoid arthritis (10), and CCR4-bearing T<sub>h</sub>2 cells are recruited by CC chemokines, thymus and activation-regulated chemokine (TARC), and macrophage-derived chemokine (MDC) (11), and the size of this population is much increased in human atopic diseases (K. Kurashima *et al.* and T. Miyawaki *et al.*, unpublished observations). With regard to chemokines, preferential or high expression of macrophage inflammatory protein (MIP)-1 $\alpha$ , MIP-1 $\beta$ , and regulated upon activation,

normal T cell expressed and presumably secreted (RANTES) in  $T_h1$  cells has been reported (12,13).

Serial analysis of gene expression (SAGE) allows for the establishment of both a representative and comprehensive different gene expression profile in various cell types and organs under physiological and pathological states (14). Since each template contains identifiable tags corresponding to many genes, this method allows global gene expression profiling including unknown genes. In this study, we have analyzed here the expression profiles in activated  $T_h1$ - and  $T_h2$ -polarized cells using SAGE, and newly identified numerous genes for which expression is selective in either population. We have also compared our SAGE data with a recently published gene chip analysis of human  $T_h1$  and  $T_h2$  cells (15).

## Methods

### Medium

The culture medium used throughout was RPMI 1640 supplemented with 2 mM L-glutamine, 1% non-essential amino acids, 1% pyruvate,  $5 \times 10^{-5}$  M 2-mercaptoethanol (Gibco/BRL, Gaithersburg, MD) and 10% FBS (JRH Biosciences, Lenexa, KS).

### Generation of $T_h1$ and $T_h2$ cells from cord blood leukocytes

Human neonatal leukocytes were isolated from freshly collected, heparinized, neonatal cord blood by density-gradient centrifugation using Lymphoprep (density 1.077; Nycomed, Oslo, Norway).  $T_h1$ - and  $T_h2$ -polarized cells were generated by stimulating cord blood leukocytes with 1  $\mu$ g/ml phytohemagglutinin (Gibco/BRL) in the presence of 2 ng/ml IL-12 (Genzyme Techne, Minneapolis, MN) and 200 ng/ml neutralizing anti-IL-4 antibody (34019.111; R & D Systems; Minneapolis, MN) for  $T_h1$  cultures, and 200 U/ml IL-4 (provided by Ono Pharmaceutical, Osaka, Japan) and 2  $\mu$ g/ml neutralizing anti-IL-12 antibody (C8.6; Genzyme, Cambridge, MA) for  $T_h2$  cultures. Cells were washed on day 3 and expanded in each medium containing 4 ng/ml IL-2. At days 12–14, leukocytes were incubated with anti-CD4 mAb-coated magnetic beads and  $CD4^+$  cells were isolated by passing the cultured cells through a MACS system (Miltenyi Biotec, Bergish Gladbach, Germany).

### Single-cell analysis of cytokine production

Cord blood-derived  $T_h1$  and  $T_h2$  cells were collected after 3 days of  $CD4^+$  cell separation, washed and re-stimulated with 50 ng/ml of phorbol myristate acetate (PMA) and 1  $\mu$ g/ml of ionomycin (Sigma, St Louis, MO) for 4 h; 10  $\mu$ g/ml of Brefeldin A (Sigma) was added during the last 2 h of the culture. Then the cells were fixed and permeabilized with IntraPrep permeabilization reagent (Immunotech, Marseille, France) according to the manufacturer's protocol. Fixed cells were stained with FITC-labeled anti-IFN- $\gamma$  (4S.B3) and phycoerythrin (PE)-labeled anti-IL-4 (MP4-25D2) mAb (PharMingen, San Diego, CA), and analyzed by an Epics XL (Coulter Electronics, Hialeah, FL). The software program System II (Coulter) was used on an Epics XL.

### FACS analysis

$T_h1$ - and  $T_h2$ -polarized cells were incubated with optimal concentrations of FITC-labeled anti-CCR4 mAb (11) and PE-labeled anti-CD45RO (UCHL1) mAb (PharMingen). After staining and fixation, analysis was performed using an Epics XL (Coulter Electronics).

### SAGE protocol

mRNAs of  $T_h1$  and  $T_h2$  cells were purified from a mixture of total RNA from four donors. Poly(A)<sup>+</sup> mRNA was isolated using the  $\mu$ MACS mRNA isolation kit (Miltenyi Biotec) according to the manufacturer's instructions. SAGE libraries were generated using 2.5  $\mu$ g poly(A)<sup>+</sup> mRNA and were converted to cDNA with a BRL synthesis kit (Gibco/BRL) following the manufacturer's protocol, with the inclusion of primer biotin-5'-T18-3'. The outline of the SAGE protocol has been described in a previous report (16). Briefly, the cDNA was cleaved with *NlaIII* and the 3'-terminal cDNA fragments were bound to Dynabeads M-280-streptavidin (DynaL, Oslo, Norway). After ligation of the oligonucleotides containing recognition sites for *BsmF1*, the bound cDNA was released from the beads by digestion with *BsmF1*. SAGE tag overhangs were filled in with Klenow, and tags from the two pools were combined and ligated to each other. The ligation product was amplified with PCR, concatemerized and cloned into the *SphI* site of pZero-1 (Invitrogen, Carlsbad, CA). Samples were sequenced with the BigDye terminator kit and analyzed using a 96-lane 377 ABI automated sequencer (Perkin-Elmer, Branchburg, NJ).

Sequence files were analyzed by means of the SAGE program group and DNAsis software (Takara, Osaka, Japan). After correcting sequencing mistakes, a total of 64,510 tags representing 32,219 and 32,291 tags from  $T_h1$  and  $T_h2$  cells respectively were analyzed.

### RT-PCR

The RNA was reverse transcribed in 50  $\mu$ l of 10 mM Tris-HCl (pH 8.3), 6.5 mM MgCl<sub>2</sub>, 50 mM KCl, 10 mM DTT, 1 mM of each dNTP, 2  $\mu$ M random hexamer and 2.4 U/ $\mu$ l of Molony murine leukemia virus reverse transcriptase for 1 h at 42°C. The conditions for PCR were as follows: in a 50  $\mu$ l reaction, 15  $\mu$ M of each primer, 125  $\mu$ M each of dNTP mixture (Toyobo, Osaka, Japan), 50 mM KCl, 10 mM Tris-HCl (pH 8.3), 1.5 mM MgCl<sub>2</sub> and AmplyTaq (Perkin-Elmer). Primers used were as follows. Osteopontin: sense 5'-TGGCTAAACCC-TGACCCATCT-3', antisense 5'-TGGATGTCAGGTCTGCG-AAA-3'; GAPDH: sense 5'-CCTTCATTGACCTCAACTAC-3', antisense 5'-ACCACAGTCCATGCCATCACT-3'; FUS: sense 5'-AACGGGACAGCCCATGATT-3', antisense 5'-GGGCCTTACTGTTGCATT-3'; IFN- $\gamma$ : sense 5'-CTGTTACTGCCAG-GACCCATATGTAAAAG-3', antisense 5'-CAACCATTACTGGATGCTCTTCGACCTTG-3'; MIP-1 $\beta$ : sense 5'-CCGCCT-GCTGCTTTTCTTAC-3', antisense 5'-TGACAGTGGACCATC-CATAGGG-3'; IL-13: sense 5'-TCAATCCTCTCCTGTTGGC-AC-3', antisense 5'-CGTCCCTCGCGAAAAAGTTT-3'; lymphotactin: sense 5'-AGACTTCTCATCCTGGCCCT-3', antisense: 5'-GCCAGAGACTACTAGCCAGTCA-3'; IL enhancer binding factor (ILF)-2: sense 5'-TTCCTCAGTGAGGCCTTGCT-3', antisense 5'-GAAGATTGGGTGGCACTGTTG-3'.

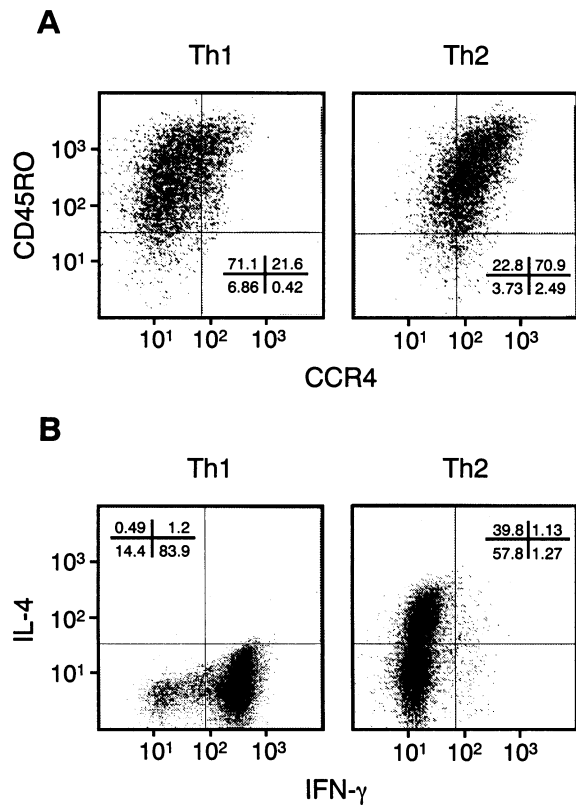

**Fig. 1.** Polarization of  $T_h1$  and  $T_h2$  cells from cord blood cells. (A) Surface CCR4 expression on  $T_h1$ - and  $T_h2$ -polarized cells. Both cells were memory ( $CD45RO^+$ ) subsets and  $T_h2$ -polarized cells were preferentially expressed in CCR4. (B) Cytokine expression profile of  $T_h1$ - and  $T_h2$ -polarized cells stimulated with PMA and ionomycin.

Reaction mixtures were incubated in a Perkin-Elmer DNA thermal cycler for 25–35 cycles (denaturation for 30 s at 94°C, annealing for 60 s at 59°C and extension for 60 s at 72°C).

#### Statistical analysis

Statistical significance between samples was calculated using the equation:

$$(N_1 - kN_1^{1/2}) - (N_2 + kN_2^{1/2})$$

where  $N_1$  and  $N_2$  represent the larger and smaller of the two numbers respectively, and  $k$  is the degree of confidence;  $P = 0.05$  ( $k = 1.96$ ) and  $P = 0.01$  ( $k = 2.58$ ). Positive values derived from the equation were deemed statistically significant at the respective confidence intervals (17).

## Results and discussion

SAGE technology can provide quantitative and simultaneous analysis of large numbers of transcripts. In this study, we investigated human activated  $T_h1$ - and  $T_h2$ -polarized cells. Surface CCR4 expression and the cytokine expression profile were analyzed on these two subsets (Fig. 1A and B). CCR4 has been reported to be selectively expressed on  $T_h2$  cells (11). Our results confirmed that the lymphocytes derived from cord blood cells were well differentiated into  $T_h1$  or  $T_h2$  cells.

The mRNAs were prepared from these cells after stimulation with PMA and ionomycin for 6 h, and were processed to SAGE analysis. A total of 64,510 tags, including 32,219 and 32,291 tags from activated  $T_h1$  and  $T_h2$  cells respectively, allowed identification of 22,096 different transcripts. The expressed genes were searched for through the GenBank database to identify individual genes. The top 50 transcripts in two subsets are listed in Table 1. Twenty-four and 25 out of the top 50 transcripts were ribosomal proteins in activated  $T_h1$  and  $T_h2$  cells respectively. However, many genes identical to the cDNAs of secreted proteins were also identified. A  $T_h1$  cytokine,  $IFN-\gamma$ , was greatly expressed in activated  $T_h1$  cells, whose expression frequency is 5.78%. High expression of genes encoding granulocyte macrophage colony stimulating factor (GM-CSF) (0.84%), MIP-1 $\beta$  (0.83%), IL-2 (0.82%), IL-3 (0.74%), TNF- $\alpha$  (0.42%), lymphotactin (0.38%), granzyme B (0.36%) and MIP-1 $\alpha$  (0.28%) were also observed in activated  $T_h1$  cells. On the other hand, the genes encoding IL-2 (0.37%), GM-CSF (0.36%), TNF- $\alpha$  (0.29%), IL-3 (0.28%), granzyme B (0.27%) and IL-13 (0.22%) were detected in activated  $T_h2$  cells. Unlike monocyte-derived macrophages and dendritic cells (18,19), the transcripts related to cytoskeleton or cell structure are not highly expressed. This may reflect minimal morphological changes of T cells even after activation.

Expressed genes between activated  $T_h1$  and  $T_h2$  cells were compared, and are shown in Fig. 2. Each dot represents a gene expressed in these two subsets and the expression levels of most of the transcripts between these two subsets were very similar. However, the expression profiles also showed significant difference in many transcripts of these cells.

Tables 2 and 3 show the genes selectively expressed in activated  $T_h1$  or  $T_h2$  cells ( $T_h1 > T_h2$ , 68 genes;  $P < 0.05$ ;  $T_h1 < T_h2$ , 14 genes;  $P < 0.05$ ). The genes in the EST database or unidentified in the GenBank database are excluded from the tables and are available at <http://www.prevent.m.u-tokyo.ac.jp/SAGE.html>. Among cytokine and chemokine genes,  $IFN-\gamma$  was expressed 49.2-fold higher in activated  $T_h1$  cells than in activated  $T_h2$  cells. Furthermore, we identified numerous  $T_h1$ -predominantly expressed genes such as osteopontin (19.0-fold), MIP-1 $\beta$  (15.5-fold), lymphotactin (12.5-fold), perforin (11.0-fold), MIP-1 $\alpha$  (6.6-fold), RANTES (6.0-fold), lymphotoxin  $\alpha$  (5.0-fold), IL-3 (2.7-fold), GM-CSF (2.3-fold), NK enhancing factor (NKEF) (2.3-fold) and IL-2 (2.2-fold).

It has been reported that MIP-1 and RANTES, which are ligands of CCR5, chemoattract the cells related to  $T_h1$ -dominated cellular immunity (8,20,21). Interestingly, lymphotactin, expressed in activated  $T_h1$  cells, has chemotactic activity to  $CD8^+$  and NK cells (22). Furthermore, NKEF has an ability to enhance NK cytotoxicity (23). Thus, it suggests that once  $T_h1$  cells are activated, effector cells in cellular immunity are recruited around  $T_h1$  cells and then accelerate immune response against invading microorganisms or neoplasm. Osteopontin is not only an adhesive matrix protein (24) but also a chemotactic molecule for smooth muscle cells and T cells (25,26). The granulomatous responses in sarcoidosis and tuberculosis have been reported to be associated with high expression of osteopontin (27,28).

Only IL-13 and IL-9 were cytokines predominantly expressed in activated  $T_h2$  cells, which are related to asthma

**Table 1.** Transcript profile in activated  $T_h1$  and  $T_h2$ -polarized cells<sup>a</sup>

| Activated Th1 |              |                                                        | Activated Th2 |              |                                                        |
|---------------|--------------|--------------------------------------------------------|---------------|--------------|--------------------------------------------------------|
| Abundance (%) | Tag Sequence | GenBank match (Accession No.)                          | Abundance (%) | Tag Sequence | GenBank Match (Accession No.)                          |
| 5.78          | CCTGGTGCCT   | IFN- $\gamma$ (X13274)                                 | 1.07          | GTGAAACCCC   | multiple matches                                       |
| 0.89          | TGTGTTGAGA   | translation elongation factor 1 $\alpha$ 1 (NM_001402) | 0.92          | TGTGTTGAGA   | translation elongation factor 1 $\alpha$ 1 (NM_001402) |
| 0.83          | GATAACACAT   | MIP-1 $\beta$ (M23502)                                 | 0.87          | CCTGTAATCC   | multiple matches                                       |
| 0.84          | GCAGAAGAA    | GM-CSF (M10663)                                        | 0.67          | TTGGTCCCT    | ribosomal protein L41 (Z12962)                         |
| 0.82          | TGTGAATATG   | IL-2 (V00564)                                          | 0.61          | GTTGTGGTTA   | $\beta$ 2-microglobulin (AB021288)                     |
| 0.75          | GTGAAACCCC   | multiple matches                                       | 0.54          | CAAGCATCCC   | multiple matches                                       |
| 0.74          | TTCATTTGTA   | IL-3 (M17115)                                          | 0.54          | CCACTGCACT   | ribosomal protein L10 (M64241)                         |
| 0.69          | GTTGTGGTTA   | $\beta$ 2-microglobulin (AB021288)                     | 0.52          | GCCGTGTCCG   | ribosomal protein S6 (J03537)                          |
| 0.66          | TTGGTCCCT    | ribosomal protein L41 (Z12962)                         | 0.51          | TAGGTTGTCT   | tumor protein, translationally -controlled 1 (X16064)  |
| 0.64          | CCTGTAATCC   | multiple matches                                       | 0.49          | CCCGTCCGGA   | ribosomal protein L13 (X64707)                         |
| 0.56          | AAAACATCT    | multiple matches                                       | 0.49          | GCCGAGGAAG   | ribosomal protein S12 (X53505)                         |
| 0.52          | CACAAACGGT   | ribosomal protein S27 (L19739)                         | 0.46          | TGCACGTTT    | ribosomal protein L32 (X03342)                         |
| 0.50          | CCCGTCCGGA   | ribosomal protein L13 (X64707)                         | 0.44          | GTGAAACCC    | multiple matches                                       |
| 0.49          | TAGGTTGTCT   | tumor protein, translationally -controlled 1 (X16064)  | 0.37          | TGTGAATATG   | IL-2 (V00564)                                          |
| 0.46          | GCCGAGGAAG   | ribosomal protein S12 (X53505)                         | 0.37          | CACAAACGGT   | ribosomal protein S27 (L19739)                         |
| 0.45          | ATAATTCCTT   | ribosomal protein S29 (U1497)                          | 0.37          | CCAGAACAGA   | multiple matches                                       |
| 0.45          | CCACTGCACT   | ribosomal protein L10 (M64241)                         | 0.36          | GCAGAAGAA    | GM-CSF (M10663)                                        |
| 0.45          | GCCGTGTCCG   | ribosomal protein S6 (J03537)                          | 0.36          | ATAATTCCTT   | ribosomal protein S29 (L31610)                         |
| 0.45          | TGGTGTGAG    | ribosomal protein S18 (X69150)                         | 0.35          | AAAACATCT    | ribosomal protein S6 (J03537)                          |
| 0.42          | CTGGGTTAAT   | ribosomal protein S19 (M81757)                         | 0.31          | TGGTGTGAG    | ribosomal protein S18 (X69150)                         |
| 0.42          | TAGCCCCCTG   | TNF $\alpha$ (M10988)                                  | 0.30          | CGCCGGAACA   | ribosomal protein L4 (D23660)                          |
| 0.42          | TGCACGTTT    | ribosomal protein L32 (X03342)                         | 0.29          | CGCCGCCGC    | ribosomal protein L35 (U12465)                         |
| 0.38          | GGATTTGGCC   | multiple matches                                       | 0.29          | TAGCCCCCTG   | TNF $\alpha$ (M10988)                                  |
| 0.38          | AATAAAATTA   | lymphotactin (U23372)                                  | 0.29          | AAGGTGGAGG   | ribosomal protein L18a (X69150)                        |
| 0.36          | AAACGCTACT   | granzyme B (J03189)                                    | 0.29          | CTGGGTTAAT   | ribosomal protein S19 (M81757)                         |
| 0.36          | CCGTCCAAGG   | ribosomal protein S16 (M60854)                         | 0.28          | TTCATTTGTA   | IL-3 (M17115)                                          |
| 0.33          | CAAGCATCCC   | multiple matches                                       | 0.28          | GGATTTGGCC   | multiple matches                                       |
| 0.31          | AAGGTGGAGG   | ribosomal protein L18a (X69150)                        | 0.27          | CGCTGGTCC    | ribosomal protein L11 (L05092)                         |
| 0.31          | CCAGAACAGA   | multiple matches                                       | 0.27          | AAACGCTACT   | granzyme B (J03189)                                    |
| 0.30          | GTGAAACCC    | multiple matches                                       | 0.26          | CCGTCCAAGG   | ribosomal protein S16 (M60854)                         |
| 0.30          | CGCCGCCGC    | ribosomal protein L35 (U12465)                         | 0.26          | GGGCTGGGT    | multiple matches                                       |
| 0.29          | AGCTCTCCCT   | ribosomal protein L17 (X53777)                         | 0.25          | GTGACCACGG   | multiple matches                                       |
| 0.28          | GCACAAAGC    | MIP-1 $\alpha$ (X03754)                                | 0.25          | GCCATAAAAT   | hematopoietic proteoglycan core protein (X17042)       |
| 0.28          | GCAGCCATCC   | ribosomal protein L28 (U14969)                         | 0.24          | TTGGCCAGGC   | multiple matches                                       |
| 0.25          | AAGACAGTGG   | ribosomal protein L37a (L06499)                        | 0.23          | AGCTCTCCCT   | ribosomal protein L17 (X53777)                         |
| 0.25          | GGCCGCGTTC   | ribosomal protein S17 (M13932)                         | 0.23          | AGGCTACGGA   | ribosomal protein L13a (X56932)                        |
| 0.24          | CGCCGGAACA   | ribosomal protein L4 (D23660)                          | 0.22          | GGCCGCGTTC   | ribosomal protein S17 (M13932)                         |
| 0.24          | GGGCTGGGT    | multiple matches                                       | 0.22          | GACGACACGA   | ribosomal protein S28 (U14969)                         |
| 0.23          | ATGGCTGGTA   | ribosomal protein S2 (X17206)                          | 0.22          | GCAGCCATCC   | ribosomal protein L28 (U14969)                         |
| 0.22          | CGCTGGTTC    | ribosomal protein L11 (L05092)                         | 0.22          | GGCTGGTCTG   | ESTs                                                   |
| 0.22          | GCCATAAAAT   | hematopoietic proteoglycan core protein (X17042)       | 0.22          | TGGTGGGACA   | IL-13 (L06801)                                         |
| 0.22          | CTGACCTGTG   | MHC class I B (D87665)                                 | 0.21          | CCCAGCCAG    | ribosomal protein S3 (U14990)                          |
| 0.22          | GAGAGTGTCT   | TIMP-1 (X03124)                                        | 0.21          | GAGGGAGTTT   | ribosomal protein L27a (U14968)                        |
| 0.21          | CTAAGACTTC   | multiple matches                                       | 0.20          | ATGGCTGGTA   | ribosomal protein S2 (X17206)                          |
| 0.21          | CCCAGCCAG    | ribosomal protein S3 (U14990)                          | 0.20          | CTGACCTGTG   | MHC class I B (D87665)                                 |
| 0.20          | ATTCTCCAGT   | ribosomal protein L23 (X52839)                         | 0.20          | GTTCCCTGGC   | ribosomal protein S30 (X65923)                         |
| 0.20          | GGCAAGCCCC   | multiple matches                                       | 0.20          | AAAAAAAAAA   | multiple matches                                       |
| 0.20          | GACGACACGA   | ribosomal protein S28 (U14969)                         | 0.20          | TCAGACGCAG   | prothymosin $\alpha$ (M14483)                          |
| 0.20          | AGGCTACGGA   | ribosomal protein L13a (X56932)                        | 0.19          | CTAAGACTTC   | multiple matches                                       |
| 0.20          | AGAACAAAC    | NKEF (X67951)                                          | 0.19          | TGATTTCACT   | multiple matches                                       |

<sup>a</sup>The top 50 transcripts expressed in activated  $T_h1$  and  $T_h2$  cells are listed. The tag sequence represents the 10 bp SAGE tag. Probable GenBank matches are listed.

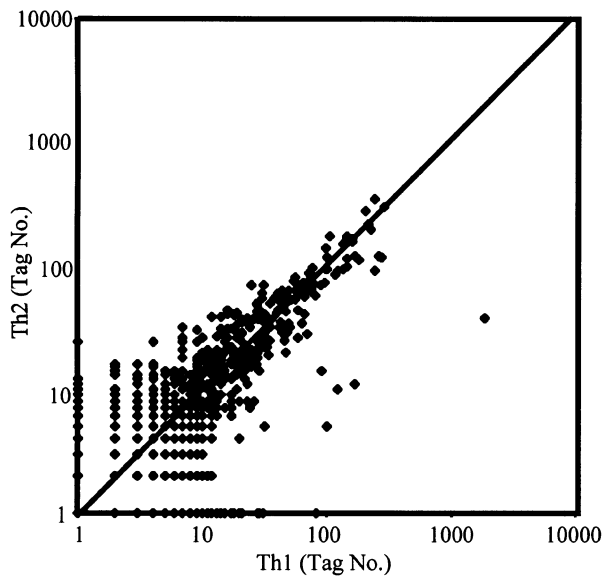

**Fig. 2.** Distribution of the different tags from  $T_h1$  and  $T_h2$  cells. The number of times each unique SAGE tag appeared was plotted on a logarithmic scale, using a total of 32,219 tags from activated  $T_h1$  cells (x-axis) versus 32,291 tags from activated  $T_h2$  cells (y-axis). To avoid division by 0, we used a tag value of 1 for any tag that was not detectable in one sample and the tag populations were normalized. The line with slope of a unity through the center predicts equal gene expression in the two subsets.

or atopic dermatitis (29–31). The mRNA expression of IL-4 and IL-10 was not significantly different between  $T_h1$  and  $T_h2$  cells, and the tag of IL-5 was not detected in either library (Table 3). However, we could confirm the expression of mRNAs of these  $T_h2$ -related cytokines in activated  $T_h2$  cells by RT-PCR (data not shown). This might be due to too low expression of these molecules to be analyzed by SAGE.

$T_h1/T_h2$  differentiation-regulatory genes, such as T-bet, GATA-3 and c-Maf, were not significantly different after activation. However, many immediate-early genes such as *c-jun* and *c-fos*, which propagate the cellular responses to growth stimuli, were highly induced in activated  $T_h1$  cells. NOT (TINUR), which was originally cloned from apoptotic human T lymphoid PEER cells stimulated with PMA and calcium ionophore (32), and TRAIL, which is a member of the TNF family and mediates activation-induced cell death of mature T lymphocytes (33), were highly expressed in  $T_h1$  cells as listed in the 'Apoptosis' category of Table 3. These results may indicate that early-responsive genes in activated  $T_h1$  cells are up-regulated more than in activated  $T_h2$  cells; however, apoptosis-related genes are also induced quickly in activated  $T_h1$  cells in order to eliminate over-activated  $T_h1$  cells. ILF-2 (8.0-fold in activated  $T_h2$  cells) is one of the components of NF-AT (34) and the activation of NF-AT is reported to be involved in the effector function of  $T_h2$  cells (35,36). Thus, it suggests the possibility that ILF-2 is one of the regulators of NF-AT and affects the function of activated  $T_h2$  cells.

All genes categorized in apoptosis and proteolysis were predominantly expressed in activated  $T_h1$  cells. TIMP-1 is an inhibitor of matrix metalloproteinases, which play a crucial

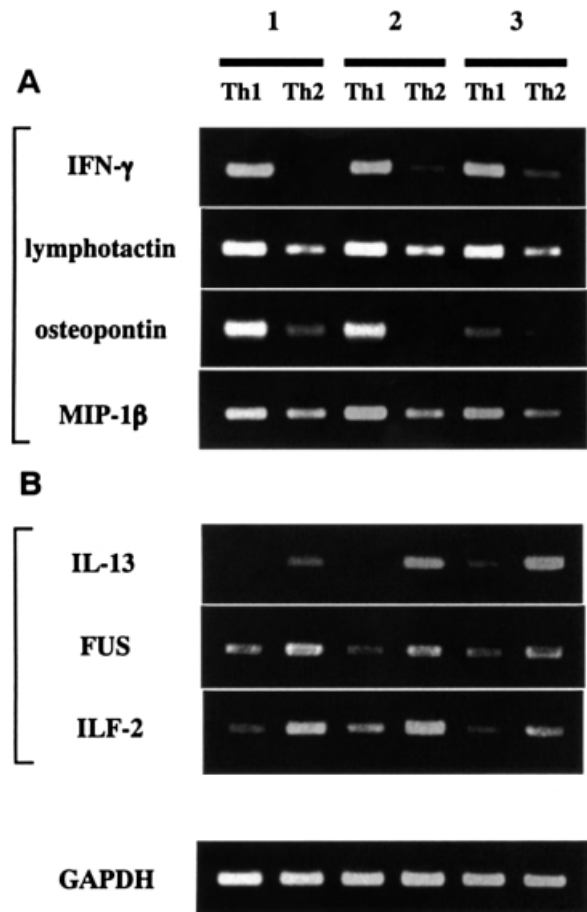

**Fig. 3.** RT-PCR analysis of genes expressed differently in activated  $T_h1$  and  $T_h2$  cells. RT-PCR was performed on total RNA isolated from both cells. Genes preferentially expressed in (A) activated  $T_h1$  cells and (B) activated  $T_h2$  cells.

role in the infiltration of inflammatory cells and the induction of airway hyper-responsiveness (37). Thus, lower expression of TIMP-1 in the  $T_h2$ -dominant condition may contribute to disease onset of some  $T_h2$  diseases, such as asthma.

With regard to enzymes and signaling molecules, the genes encoding kinases and phosphatases are categorized in Table 3. However, JAK and STAT families, which are related to the cytokine signaling pathway (33), were barely detected in either activated  $T_h1$  or  $T_h2$  cells.  $\beta$ -Catenin ( $T_h1$ ; 7 tags,  $T_h2$ ; 0 tags) provides a link between cell-surface-expressed cadherins and represents a key molecule connecting cellular adhesion to signal transduction pathways (38). Cadherin expressed on T lymphocytes forms a complex with  $\beta$ -catenin (39), and might be involved in the interactions between activated T cells, especially activated  $T_h1$  cells, and their cellular targets or the extracellular matrix.

$Ca^{2+}$  controls various functions of the cells and is very important for signal transduction. Recently, it has been reported that the rate of  $Ca^{2+}$  clearance from the cytosol in  $T_h2$  cells was higher than that in  $T_h1$  cells and the expression of the  $Ca^{2+}$ -activated  $K^+$  channel, which controls the membrane potential, is increased in  $T_h1$  cells, and these differences may

**Table 2.** Differential tag abundance in activated  $T_h1$ - and  $T_h2$ -polarized cells (1)<sup>a</sup>

| A. Th1>Th2         |         |                   |      |     |                                                                                         |
|--------------------|---------|-------------------|------|-----|-----------------------------------------------------------------------------------------|
| Th1/Th2*<br>(fold) | P value | Th1/Th2<br>(fold) | Th1  | Th2 | Tag<br>Sequence GenBank Match                                                           |
| p<0.01             |         |                   |      |     |                                                                                         |
| 61.5               | 0.048   | 49.2              | 1770 | 36  | CCTGGTGCTT IFN- $\gamma$ [X13274]                                                       |
|                    |         | 19.0              | 19   | 0   | AATAGAAATT osteopontin [X13694]                                                         |
| 15.2               | 0.032   | 15.5              | 248  | 16  | GATAACACAT MIP-1 $\beta$ [M23502]                                                       |
|                    |         | 12.5              | 125  | 10  | AATAAAATTA lymphotactin [U23372]                                                        |
|                    |         | 8.0               | 8    | 0   | CTGGCTGCAA cytochrome c oxidase<br>subunit V $\beta$ [M19961]                           |
|                    |         | 7.0               | 7    | 0   | TAGCTCTATG ATPase, Na <sup>+</sup> /K <sup>+</sup> transporting,<br>$\alpha$ 1 [U16798] |
|                    |         | 7.0               | 7    | 0   | TTTTTGATCA $\beta$ -catenin [X87838]                                                    |
|                    |         | 7.0               | 7    | 0   | TAAAACAAGA CD55 [M31516]                                                                |
| 6.1                | 0.001   | 6.6               | 86   | 13  | GCACCAAAGC MIP-1 $\alpha$ [X03754]                                                      |
| 7.2                | 0.021   | 11.0              | 11   | 1   | TACATAGCTT perforin [L40557]                                                            |
|                    |         | 10.0              | 10   | 1   | CTATAGCATA amphiregulin [M30704]                                                        |
|                    |         | 10.0              | 10   | 1   | CAGGTGCTGT KIAA0601 protein<br>[U61836]                                                 |
| p<0.05             |         |                   |      |     |                                                                                         |
| 3.5                | 0.028   | 6.5               | 13   | 2   | TAAATGAAAA NOT [S77154]                                                                 |
| 5.8                | 0.013   | 6.0               | 12   | 2   | CCACTACACT TRAIL [U37518]                                                               |
|                    |         | 6.0               | 6    | 0   | CAGAGATGAA heat shock 70kD protein 1<br>[NM_005345]                                     |
|                    |         | 6.0               | 6    | 0   | TCTGCAATGA hypothetical protein [AJ012409]                                              |
|                    |         | 6.0               | 6    | 0   | GCGGTGTACA natural killer cell group 7 sequence<br>(NKG7) [S69115]                      |
|                    |         | 6.0               | 6    | 0   | AAAAATCGGC RANTES [M21121]                                                              |
|                    |         | 5.0               | 20   | 4   | TGAAAGTGTG heat shock 105kD $\alpha$ [D86956]                                           |
| 2.3                | 0.036   | 5.0               | 5    | 0   | GTGTTTTTAT apoptosis inhibitor 2<br>(IAP homolog C) [U37546]                            |
|                    |         | 5.0               | 5    | 0   | TTAGTTAAGC archain 1 [X81198]                                                           |
|                    |         | 5.0               | 5    | 0   | AGACTGGAAG CD3D antigen [NM_000732]                                                     |
|                    |         | 5.0               | 5    | 0   | AAAACAAAAA cDNA DKFZp586H021 [AL110196]                                                 |
|                    |         | 5.0               | 5    | 0   | AGGGATCACA lymphotoxin $\alpha$ [X01393]                                                |
|                    |         | 5.0               | 5    | 0   | TGAGAGGAGA NADH dehydrogenase (ubiquinone)<br>1 $\beta$ subcomplex 5 [AF047181]         |
|                    |         | 5.0               | 5    | 0   | AGGAACCAGA phosphatase A2 inhibitor [U51924]                                            |
|                    |         | 5.0               | 5    | 0   | ATCAGTGGCT proteasome subunit,<br>$\beta$ type 4 [D26600]                               |
|                    |         | 5.0               | 5    | 0   | AGACAAGCTG splicing factor, arginine/serine-rich 5<br>[AF070562]                        |
|                    |         | 5.0               | 5    | 0   | TTGGCCAGAA transcription factor CA150 [AF017789]                                        |
|                    |         | 5.0               | 5    | 0   | TCCTGGCTCT ubiquitin specific protease 12 [AF022789]                                    |
|                    |         | 4.0               | 4    | 0   | CTGTTATAGG ATP-dependent metalloprotease<br>YME1L [AJ132637]                            |
|                    |         | 4.0               | 4    | 0   | TGGAAAGTGA c-fos [NM_005252]                                                            |
|                    |         | 4.0               | 4    | 0   | CTAACGCAGC c-jun [NM_002228]                                                            |
|                    |         | 4.0               | 4    | 0   | AGCCTGCTCA CD73 [X55740]                                                                |
|                    |         | 4.0               | 4    | 0   | TAGCAGCAAT cDNA DKFZp564A132 [AL049963]                                                 |
|                    |         | 4.0               | 4    | 0   | CACCAGCATT chromosome 15<br>open reading frame 3 [AL109701]                             |
|                    |         | 4.0               | 4    | 0   | TACGTTGCAG GC20 [AF064607]                                                              |
|                    |         | 4.0               | 4    | 0   | CACGGACACG GOT1 [M37400]                                                                |
|                    |         | 4.0               | 4    | 0   | TACTAGTCCT heat shock protein 90 [X15183]                                               |
|                    |         | 4.0               | 4    | 0   | AGCTGTTCTG heterogeneous nuclear ribonucleoprotein<br>A1 [X79536]                       |
|                    |         | 4.0               | 4    | 0   | GATGAACTGA htra2- $\beta$ [U61267]                                                      |
|                    |         | 4.0               | 4    | 0   | CAGGAACGGG MEK2 [L11285]                                                                |
|                    |         | 4.0               | 4    | 0   | TTCTATTTCA moesin [M69066]                                                              |

Table 2. Continued

|     |     |     |            |                                                                 |
|-----|-----|-----|------------|-----------------------------------------------------------------|
| 4.0 | 4   | 0   | GCTCTTCTGC | NF-ATc [U08015]                                                 |
| 4.0 | 4   | 0   | GCGGACGAGG | PDCD5 [AF014955]                                                |
| 4.0 | 4   | 0   | CTCTGCTCGG | peflin [AB018357]                                               |
| 4.0 | 4   | 0   | CCCTGCTCCT | phenylalanyl-tRNA synthetase<br>β-subunit [AF042346]            |
| 4.0 | 4   | 0   | CACGCCAGCC | phosphatidylethanolamine<br>N-methyltransferase [AB029821]      |
| 4.0 | 4   | 0   | GCTTTGCAGT | potassium channel, subfamily K,<br>member 3 (TASK) [AF006823]   |
| 4.0 | 4   | 0   | AGTTTTACAA | proteasome subunit,<br>ATPase, 4 [AF038965]                     |
| 4.0 | 4   | 0   | ACAGATGTTG | proteasome subunit, p42 [D78275]                                |
| 4.0 | 4   | 0   | ACTTAAGTAC | protein phosphatase 1 regulatory<br>subunit 2 (PPP1R2) [X78873] |
| 4.0 | 4   | 0   | CTGGATGCCG | RD protein [L03411]                                             |
| 4.0 | 4   | 0   | TTTCTTAAAG | RNA binding protein [AB016092]                                  |
| 4.0 | 4   | 0   | CTGTTTAGTG | serine/threonine protein kinase<br>PRK [U56998]                 |
| 4.0 | 4   | 0   | GACCAGGAGA | SGN3 [AF031647]                                                 |
| 4.0 | 4   | 0   | CTTAAATATC | SID6-8061 mRNA for pyrophosphatase<br>[AB026723]                |
| 4.0 | 4   | 0   | TTATGGGGAG | stress-induced-phosphoprotein 1 [M86752]                        |
| 4.0 | 4   | 0   | TCATAACTGT | succinate dehydrogenase flavoprotein<br>subunit (SDH)           |
| 4.0 | 4   | 0   | GGTGTGTCCG | ubiquitin specific protease 7 [Z72499]                          |
| 4.0 | 4   | 0   | TGGGCGCCTT | uroporphyrinogen decarboxylase [M14016]                         |
| 4.0 | 4   | 0   | GACAGTGACG | zinc finger protein [D45213]                                    |
| 2.7 | 69  | 26  | GAGAGTGTCT | TIMP-1 [X03124]                                                 |
| 2.7 | 248 | 93  | TTCATTTGTA | IL-3 [M17115]                                                   |
| 2.4 | 46  | 19  | GCCTGTATGA | ribosomal protein S24                                           |
| 2.3 | 253 | 110 | GCAGAAGAAT | GM-CSF [M10663]                                                 |
| 2.3 | 57  | 25  | AGAACAAAAC | NKEF [X67951]                                                   |
| 2.2 | 255 | 114 | TGTGAATATG | IL-2 [V00564]                                                   |

## B. Th1&lt;Th2

| Th2/Th1*<br>(fold) | P value | Th1/Th2<br>(fold) | pTh1 | pTh2 | Tag<br>Sequence | GenBank Match                                                   |
|--------------------|---------|-------------------|------|------|-----------------|-----------------------------------------------------------------|
| p<0.01             |         |                   |      |      |                 |                                                                 |
|                    |         | 9.0               | 0    | 9    | GGGGGTAACT      | fusion, derived from t(12;16)<br>malignant liposarcoma [X71428] |
|                    |         | 8.0               | 0    | 8    | GTGACAGACA      | interleukin enhancer binding factor 2,<br>45kD [U10323]         |
|                    |         | 7.0               | 0    | 7    | CTGGCGAGCG      | Human ubiquitin carrier protein<br>(E2-EPF) mRNA [M91670]       |
|                    |         | 2.5               | 26   | 65   | TGGTGGGACA      | IL-13 [L06801]                                                  |
| p<0.05             |         |                   |      |      |                 |                                                                 |
|                    |         | 11.0              | 1    | 11   | GATCACAGTT      | lactate dehydrogenase B [Y00711]                                |
|                    |         | 10.0              | 1    | 10   | TTTGGGGCTG      | proton-ATPase-like protein [D89052]                             |
|                    |         | 5.0               | 3    | 15   | CAGCTGGGGC      | PTB-2 [X65371]                                                  |
|                    |         | 5.0               | 0    | 5    | ACCAAGCTGG      | tyrosyl-tRNA synthetase [Y89436]                                |
|                    |         | 5.0               | 0    | 5    | TCACCTGTAG      | kinase A anchor protein [X97335]                                |
|                    |         | 5.0               | 0    | 5    | GGGGCTTCCA      | KIAA0239 [D87076]                                               |
|                    |         | 4.0               | 0    | 4    | CCCCTGGCTG      | modulator recognition factor I [M62324]                         |
|                    |         | 4.0               | 0    | 4    | CAACCAAACC      | IL-9 [M30134]                                                   |
|                    |         | 3.1               | 9    | 28   | GTGCAGGCTC      | TAP-1 [X57522]                                                  |
| 3.2                | 0.017   | 2.6               | 15   | 39   | GGCTCAGACC      | CD6 [X60992]                                                    |

<sup>a</sup>The 68 and 14 transcripts displaying the preferentially expressed in  $T_h1$  and  $T_h2$  cells respectively are listed. The tag sequences represent the 10 bp tag. Probable GenBank matches are listed.

\*These values are cited from (15).

**Table 3.** Differential tag abundance in activated  $T_H1$ - and  $T_H2$ -polarized cells (2)<sup>a</sup>

| Cytokines, Chemokines, and Receptors | transcriptional regulation |     | Enzymes & Signaling Molecules             |     | Ion Channel & Transporter |                                              | Growth Factors |     |                                                        |    |    |
|--------------------------------------|----------------------------|-----|-------------------------------------------|-----|---------------------------|----------------------------------------------|----------------|-----|--------------------------------------------------------|----|----|
|                                      | Th1                        | Th2 | Th1                                       | Th2 | Th1                       | Th2                                          | Th1            | Th2 |                                                        |    |    |
| IFN- $\gamma$ [X13274]               | 1770                       | 36  | NOT [S7154]                               | 13  | 2                         | $\beta$ -catenin [X87838]                    | 7              | 0   | NK1F [X67951]                                          | 57 | 25 |
| IL-3 [M17115]                        | 248                        | 93  | transcription factor CA150 [AF017789]     | 5   | 0                         | natural killer cell group 7 sequence         | 6              | 0   | amphiregulin [M310704]                                 | 10 | 1  |
| GM-CSF [M10663]                      | 253                        | 110 | e-fos [NM_005232]                         | 4   | 0                         | (NKG7) [S69115]                              | 5              | 0   |                                                        |    |    |
| IL-2 [V003564]                       | 255                        | 114 | c-jun [NM_002228]                         | 4   | 0                         | CD3D antigen [NM_000732]                     | 5              | 0   | Others                                                 |    |    |
| lymphotxin $\alpha$ [X01393]         | 5                          | 0   | heterogeneous nuclear ribonucleoprotein   | 4   | 0                         | phosphatase A2 inhibitor [U51924]            | 5              | 0   |                                                        |    |    |
| IL-9 [M30134]                        | 0                          | 4   | A1 [X79536]                               | 4   | 0                         | proteasome subunit,                          | 5              | 0   |                                                        |    |    |
| IL-13 [L06801]                       | 26                         | 65  | NF-ATc [U08015]                           | 4   | 0                         | $\beta$ type-4 [D26600]                      | 4              | 0   | CD55 [M31516]                                          | 7  | 0  |
| *IL-4                                | 1                          | 3   | zinc finger protein [D45213]              | 4   | 0                         | GOT1 [M37400]                                | 1              | 10  | KIAA0601 protein                                       | 10 | 1  |
| *IL-5                                | 0                          | 0   | fusion, derived from [12;16]              | 0   | 9                         | MEK2 [L11285]                                | 4              | 0   | [U61836]                                               | 9  | 28 |
| *IL-10                               | 1                          | 4   | malignant liposarcoma [X71428]            | 0   | 9                         | phenylalanyl-tRNA synthetase                 | 4              | 0   | heat shock 70kD protein 1                              | 6  | 0  |
| *IL-11                               | 1                          | 3   | interleukin enhancer binding factor 2,    | 0   | 8                         | $\beta$ -subunit [AF042346]                  | 4              | 0   | [NM_005345]                                            | 6  | 0  |
| *IL-2R $\alpha$                      | 2                          | 0   | 45kD [U10323]                             | 3   | 15                        | phosphatidylerthanolamine                    | 4              | 0   | hypothetical protein [AJ012409]                        | 6  | 0  |
| *IL-2R $\beta$                       | 1                          | 0   | PTB-2 [X65371]                            | 1   | 1                         | N-methyltransferase [AB029821]               | 4              | 0   | heat shock 105kD $\alpha$ [D86956]                     | 20 | 4  |
| *IL-2R $\gamma$                      | 3                          | 0   | *T-bet                                    | 1   | 0                         | serine/threonine protein kinase              | 4              | 0   | cDNA DKFZp586H02.1 [AI110196]                          | 5  | 0  |
| *IL-4R                               | 4                          | 1   | *GATA-3                                   | 1   | 0                         | PRK [U56998]                                 | 4              | 0   | splicing factor, arginine/serine-rich 5                | 5  | 0  |
| osteopontin [X13694]                 | 19                         | 0   | *c-Maf                                    | 0   | 0                         | SGN3 [AF031647]                              | 4              | 0   | [AF070562]                                             | 5  | 0  |
| lymphotactin [U23372]                | 125                        | 10  | Apopoptosis & Proteolysis                 | 248 | 16                        | SD6-8061 mRNA for pyrophosphatase [AB026723] | 4              | 0   | cDNA DKFZp564A132 [AL049963]                           | 4  | 0  |
| MIP-1 $\beta$ [M23502]               | 86                         | 13  | perforin [L40557]                         | 11  | 1                         | kinase A anchor protein [X97335]             | 0              | 5   | chromosome 15                                          | 4  | 0  |
| MIP-1 $\alpha$ [X03754]              | 6                          | 0   | TRAIL [U37518]                            | 12  | 2                         | tyrosyl-tRNA synthetase [Y89436]             | 4              | 0   | open reading frame 3 [AL109701]                        | 4  | 0  |
| RANTES [M21121]                      | 4                          | 2   | apoptosis inhibitor 2                     | 5   | 0                         | *JAK1                                        | 0              | 5   | GC20 [AF064607]                                        | 4  | 0  |
| *IL-8                                | 13                         | 15  | *IL-8                                     | 5   | 0                         | *JAK2                                        | 0              | 0   | heat shock protein 90 [X15183]                         | 4  | 0  |
| *IL-8                                | 0                          | 1   | (IAP homolog C) [U37546]                  | 5   | 0                         | *JAK3                                        | 0              | 0   | RD protein [L03411]                                    | 4  | 0  |
| *MDC                                 | 0                          | 1   | ubiquitin specific protease 12 [AF022789] | 5   | 0                         | *STAT1                                       | 0              | 0   | RNA binding protein [AB016992]                         | 4  | 0  |
| *CCR4                                | 0                          | 0   | A1P-dependent metalloprotease             | 4   | 0                         | *STAT2                                       | 0              | 0   | stress-induced-phosphoprotein 1 [M86752]               | 4  | 0  |
| *CCR5                                | 0                          | 0   | YM51L [AJ132637]                          | 4   | 0                         | *STAT3                                       | 0              | 0   | moesin [M69066]                                        | 4  | 0  |
| *CCR6                                | 25                         | 46  | PDXD5 [AF014955]                          | 4   | 0                         | *STAT4                                       | 0              | 0   | ribosomal protein S24                                  | 46 | 19 |
| *CCR7                                | 3                          | 0   | peflin [AB018357]                         | 4   | 0                         | *STAT5A                                      | 0              | 2   | Human ubiquitin carrier protein (E2-EPI) mRNA [M91670] | 0  | 7  |
| *CCR3                                | 0                          | 0   | ubiquitin specific protease 7 [Z72499]    | 4   | 0                         | *STAT6                                       | 0              | 0   | KIAA0239 [D87076]                                      | 0  | 5  |
| *CXCR4                               | 2                          | 0   | proteasome subunit,                       | 4   | 0                         |                                              | 2              | 4   | modulator recognition factor 1 [M62324]                | 0  | 4  |
|                                      |                            |     | ATPase; 4 [AF038965]                      | 4   | 0                         |                                              |                |     |                                                        |    |    |
|                                      |                            |     | htr2- $\beta$ [U61267]                    | 4   | 0                         |                                              |                |     |                                                        |    |    |
|                                      |                            |     | proteasome subunit, p42 [D78235]          | 4   | 0                         |                                              |                |     |                                                        |    |    |
|                                      |                            |     | TIMP-1 [X00124]                           | 69  | 26                        |                                              |                |     |                                                        |    |    |

<sup>a</sup>Each number of tags is normalized to 32,000.  
<sup>b</sup>Not significant.



affect the production of different cytokines between  $T_h1$  and  $T_h2$  cells (40). Thus, a gene encoding TASK, which is one of the potassium channels and preferentially expressed in activated  $T_h1$  cells, might be also related to preferential cytokine gene expression in  $T_h1$  and  $T_h2$  cells by controlling the membrane potential.

Furthermore, stress-induced transcripts such as some of the heat shock proteins were markedly expressed in activated  $T_h1$  cells. On the other hand, the gene encoding fusion, derived from t(12;16) malignant liposarcoma (FUS) is preferentially expressed in activated  $T_h2$  cells. FUS protein contains an RNA-recognition motif and is a component of nuclear riboprotein, which is related to not only cell proliferation but also cell differentiation (41). Interestingly, Hicks *et al.* reported that disruption of FUS had an effect on B cell development and activation in the cause of the defect of accessory cells (42). Thus, in type 2 immunity (humoral immunity), FUS in activated  $T_h2$  cells may have an important role in generating the specific antibodies in B lymphocytes.

Although we obtained cord blood from a minimum of four healthy volunteers to find the average gene expression, there could be differences in gene expression between individual donor-derived cells. To justify the SAGE results, we picked up seven genes of which expression is distinct between activated  $T_h1$  and  $T_h2$  cells, and analyzed their expression by RT-PCR (Fig. 3). The PCR results validated the SAGE data.

Very recently, transcript imaging of human  $T_h1/T_h2$  cells using oligonucleotide arrays of ~6000 genes was reported (15). When our SAGE data was compared with the result of oligonucleotide arrays (part of their results is cited in Table 2), it was noticed that very limited numbers of genes were examined by an oligonucleotide array by the other group. The number of human genes has been estimated to be in the range from ~35,000 to 120,000 (43–45). The SAGE data in this study includes >22,000 transcripts; however, comprehensive gene expression profile analysis using the DNA arrays lifted only 6000 genes, which is definitely too limited. Furthermore, they did not describe the abundance of these genes, either. Among the genes preferentially expressed in either cell type, the expression of genes encoding IFN- $\gamma$  [SAGE, 49.2-fold ( $T_h1$ , 1770 tags;  $T_h2$ , 36 tags); array, 61.5-fold], MIP-1 $\beta$  [SAGE, 15.5-fold ( $T_h1$ , 248 tags;  $T_h2$ , 16 tags); array, 15.2-fold], MIP-1 $\alpha$  [SAGE, 6.6-fold ( $T_h1$ , 86 tags;  $T_h2$ , 13 tags); array, 6.1-fold], perforin [SAGE, 11.0-fold ( $T_h1$ , 11 tags;  $T_h2$ , 0 tags); array, 7.2-fold], NOT [SAGE, 6.5-fold ( $T_h1$ , 13 tags;  $T_h2$ , 2 tags); array, 3.5-fold], TRAIL [SAGE, 6.0-fold ( $T_h1$ , 12 tags;  $T_h2$ , 2 tags); array, 5.8-fold] and IAP homolog C [SAGE, 5.0-fold ( $T_h1$ , 5 tags;  $T_h2$ , 0 tags); array, 2.3-fold] in activated  $T_h1$  cells, and CD6 [SAGE, 2.6-fold ( $T_h1$ , 15 tags;  $T_h2$ , 39 tags); array, 3.2-fold] in activated  $T_h2$  cells is more or less similar, but most of the genes shown to be differentially expressed are different from their results. The most probable reason for this discrepancy is that they generated  $T_h1$ - and  $T_h2$ -polarized cells for array hybridization analyses at an early stage (3 days) of the differentiation, whereas we prepared the RNAs from well-differentiated (2 weeks)  $T_h$  cells.

In conclusion, thorough identification of the genes selectively expressed in human activated  $T_h1$  and  $T_h2$  cells should provide useful information to clarify the functions of these cells. In the future, by combining with a DNA microarray

system, the data presented in this report should be very informative to diagnose various human  $T_h1/T_h2$ -dominated immune diseases. Furthermore, cloning of numerous unknown genes identified only in the EST database should provide further understanding of molecular pathogenesis of  $T_h1/T_h2$  dominated human diseases and may provide novel therapeutic targets for the treatment of these diseases.

## Acknowledgements

We are very grateful to Drs V. Velculescu, L. Zhang, W. Zhou, B. Vogelstein and M. Kinzler for their help in SAGE analysis, and also to Mr Muto and Ms Ayabe for sequencing. We highly appreciate Dr H. A. Young (National Cancer Institute, Frederick, MD) for thoughtful comments on this work.

## Abbreviations

|        |                                                                            |
|--------|----------------------------------------------------------------------------|
| FUS    | fusion, derived from t(12;16) malignant liposarcoma                        |
| GM-CSF | granulocyte macrophage colony stimulating factor                           |
| ILF    | IL enhancer binding factor                                                 |
| MDC    | macrophage-derived chemokine                                               |
| MIP    | macrophage inflammatory protein                                            |
| NKEF   | NK enhancing factor                                                        |
| PE     | phycoerythrin                                                              |
| PMA    | phorbol myristate acetate                                                  |
| RANTES | regulated upon activation, normal T cell expressed and presumably secreted |
| SAGE   | serial analysis of gene expression                                         |
| TARC   | thymus and activation-regulated chemokine                                  |

## References

- Mosmann, T. R. and Sad, S. 1996. The expanding universe of T-cell subsets:  $T_h1$ ,  $T_h2$  and more. *Immunol. Today* 17:138.
- Ho, I. C., Hodge, M. R., Rooney, J. W. and Glimcher, L. H. 1996. The proto-oncogene *c-maf* is responsible for tissue-specific expression of interleukin-4. *Cell* 85:973.
- Zheng, W. and Flavell, R. A. 1997. The transcription factor GATA-3 is necessary and sufficient for  $T_h2$  cytokine gene expression in CD4 T cells. *Cell* 89:587.
- Szabo, S. J., Kim, S. T., Costa, G. L., Zhang, X., Fathman, C. G. and Glimcher, L. H. 2000. A novel transcription factor, T-bet, directs  $T_h1$  lineage commitment. *Cell* 100:655.
- Tanaka, K., Ogawa, K., Sugamura, K., Nakamura, M., Takano, S. and Nagata, K. 2000. Cutting edge: differential production of prostaglandin D2 by human helper T cell subsets. *J. Immunol.* 164:2277.
- Nagata, K., Tanaka, K., Ogawa, K., Kemmotsu, K., Imai, T., Yoshie, O., Abe, H., Tada, K., Nakamura, M., Sugamura, K. and Takano, S. 1999. Selective expression of a novel surface molecule by human  $T_h2$  cells *in vivo*. *J. Immunol.* 162:1278.
- Austrup, F., Vestweber, D., Borges, E., Lohning, M., Brauer, R., Herz, U., Renz, H., Hallmann, R., Scheffold, A., Radbruch, A. and Hamann, A. 1997. P- and E-selectin mediate recruitment of T-helper-1 but not T-helper-2 cells into inflamed tissues. *Nature* 385:81.
- Bonocchi, R., Bianchi, G., Bordignon, P. P., D'Ambrosio, D., Lang, R., Borsatti, A., Sozzani, S., Allavena, P., Gray, P. A., Mantovani, A. and Sinigaglia, F. 1998. Differential expression of chemokine receptors and chemotactic responsiveness of type 1 T helper cells ( $T_h1$ s) and  $T_h2$ s. *J. Exp. Med.* 187:129.
- Sallusto, F., Lanzavecchia, A. and Mackay, C. R. 1998. Chemokines and chemokine receptors in T-cell priming and  $T_h1/T_h2$ -mediated responses. *Immunol. Today* 19:568.
- Suzuki, N., Nakajima, A., Yoshino, S., Matsushima, K., Yagita, H. and Okumura, K. 1999. Selective accumulation of CCR5<sup>+</sup> T lymphocytes into inflamed joints of rheumatoid arthritis. *Int. Immunol.* 11:553.

- 11 Imai, T., Nagira, M., Takagi, S., Kakizaki, M., Nishimura, M., Wang, J., Gray, P. W., Matsushima, K. and Yoshie, O. 1999. Selective recruitment of CCR4-bearing  $T_H2$  cells toward antigen-presenting cells by the CC chemokines thymus and activation-regulated chemokine and macrophage-derived chemokine. *Int. Immunol.* 11:81.
- 12 Schrum, S., Probst, P., Fleischer, B. and Zipfel, P. F. 1996. Synthesis of the CC-chemokines MIP-1alpha, MIP-1beta, and RANTES is associated with a type 1 immune response. *J. Immunol.* 157:3598.
- 13 Carson, R. T. and Vignali, D. A. 1999. Simultaneous quantitation of 15 cytokines using a multiplexed flow cytometric assay. *J. Immunol. Methods* 227:41.
- 14 Velculescu, V. E., Zhang, L., Vogelstein, B. and Kinzler, K. W. 1995. Serial analysis of gene expression. *Science* 270:484.
- 15 Rogge, L., Bianchi, E., Biffi, M., Bono, E., Chang, S. Y., Alexander, H., Santini, C., Ferrari, G., Sinigaglia, L., Seiler, M., Neeb, M., Mous, J., Sinigaglia, F. and Certa, U. 2000. Transcript imaging of the development of human T helper cells using oligonucleotide arrays. *Nat. Genet.* 25:96.
- 16 Velculescu, V. E., Zhang, L., Zhou, W., Vogelstein, J., Basrai, M. A., Bassett, D. E., Jr, Hieter, P., Vogelstein, B. and Kinzler, K. W. 1997. Characterization of the yeast transcriptome. *Cell* 88:243.
- 17 Madden, S. L., Galella, E. A., Zhu, J., Bertelsen, A. H. and Beaudry, G. A. 1997. SAGE transcript profiles for p53-dependent growth regulation. *Oncogene* 15:1079.
- 18 Hashimoto, S., Suzuki, T., Dong, H. Y., Yamazaki, N. and Matsushima, K. 1999. Serial analysis of gene expression in human monocytes and macrophages. *Blood* 94:837.
- 19 Hashimoto, S., Suzuki, T., Dong, H. Y., Nagai, S., Yamazaki, N. and Matsushima, K. 1999. Serial analysis of gene expression in human monocyte-derived dendritic cells. *Blood* 94:845.
- 20 Taub, D. D., Conlon, K., Lloyd, A. R., Oppenheim, J. J. and Kelvin, D. J. 1993. Preferential migration of activated  $CD4^+$  and  $CD8^+$  T cells in response to MIP-1 alpha and MIP-1 beta. *Science* 260:355.
- 21 Hariharan, D., Douglas, S. D., Lee, B., Lai, J. P., Campbell, D. E. and Ho, W. Z. 1999. Interferon-gamma upregulates CCR5 expression in cord and adult blood mononuclear phagocytes. *Blood* 93:1137.
- 22 Yoshida, T., Ishikawa, I., Ono, Y., Imai, T., Suzuki, R. and Yoshie, O. 1999. An activation-responsive element in single C motif-1/lymphotactin promoter is a site of constitutive and inducible DNA-protein interactions involving nuclear factor of activated T cell. *J. Immunol.* 163:3295.
- 23 Sauri, H., Ashjian, P. H., Kim, A. T. and Shau, H. 1996. Recombinant natural killer enhancing factor augments natural killer cytotoxicity. *J. Leuk. Biol.* 59:925.
- 24 Oldberg, A., Franzen, A. and Heinegard, D. 1987. Cloning and sequence analysis of rat bone sialoprotein (osteopontin) cDNA reveals an Arg-Gly-Asp cell-binding sequence. *J. Histochem. Cytochem.* 35:707.
- 25 Wuthrich, R. P., Fan, X., Ritthaler, T., Sibalic, V., Yu, D. J., Loffing, J. and Kaissling, B. 1998. Enhanced osteopontin expression and macrophage infiltration in MRL-Fas(*lpr*) mice with lupus nephritis. *Autoimmunity* 28:139.
- 26 Xuan, J. W., Hota, C. and Chambers, A. F. 1994. Recombinant GST-human osteopontin fusion protein is functional in RGD-dependent cell adhesion. *Circ. Res.* 74:214.
- 27 Nau, G. J., Guilfoile, P., Chupp, G. L., Berman, J. S., Kim, S. J., Kornfeld, H. and Young, R. A. 1997. A chemoattractant cytokine associated with granulomas in tuberculosis and silicosis. *Proc. Natl Acad. Sci. USA* 94:6414.
- 28 O'Regan, A. W., Chupp, G. L., Lowry, J. A., Goetschkes, M., Mulligan, N. and Berman, J. S. 1999. Osteopontin is associated with T cells in sarcoid granulomas and has T cell adhesive and cytokine-like properties *in vitro*. *J. Immunol.* 162:1024.
- 29 Katagiri, K., Itami, S., Hatano, Y. and Takayasu, S. 1997. Increased levels of IL-13 mRNA, but not IL-4 mRNA, are found *in vivo* in peripheral blood mononuclear cells (PBMC) of patients with atopic dermatitis (AD). *Clin. Exp. Immunol.* 108:289.
- 30 Nicolaidis, N. C., Holroyd, K. J., Ewart, S. L., Eleff, S. M., Kiser, M. B., Dragwa, C. R., Sullivan, C. D., Grasso, L., Zhang, L. Y., Messler, C. J., Zhou, T., Kleeberger, S. R., Buetow, K. H. and Levitt, R. C. 1997. Interleukin 9: a candidate gene for asthma. *Proc. Natl Acad. Sci. USA* 94:13175.
- 31 Grunig, G., Warnock, M., Wakil, A. E., Venkayya, R., Brombacher, F., Rennick, D. M., Sheppard, D., Mohrs, M., Donaldson, D. D., Locksley, R. M. and Corry, D. B. 1998. Requirement for IL-13 independently of IL-4 in experimental asthma. *Science* 282:2261.
- 32 Okabe, T., Takayanagi, R., Imasaki, K., Haji, M., Nawata, H. and Watanabe, T. 1995. cDNA cloning of a NGFI-B/nur77-related transcription factor from an apoptotic human T cell line. *J. Immunol.* 154:3871.
- 33 Martinez-Lorenzo, M. J., Alava, M. A., Gamen, S., Kim, K. J., Chuntharapai, A., Pineiro, A., Naval, J. and Anel, A. 1998. Involvement of APO2 ligand/TRAIL in activation-induced death of Jurkat and human peripheral blood T cells. *Eur J. Immunol.* 28:2714.
- 34 Corthesy, B. and Kao, P. N. 1994. Purification by DNA affinity chromatography of two polypeptides that contact the NF-AT DNA binding site in the interleukin 2 promoter. *J. Biol. Chem.* 269:20682.
- 35 Hodge, M. R., Ranger, A. M., Charles de la Brousse, F., Hoey, T., Grusby, M. J. and Glimcher, L. H. 1996. Hyperproliferation and dysregulation of IL-4 expression in NF-ATp-deficient mice. *Immunity* 4:397.
- 36 Ranger, A. M., Oukka, M., Rengarajan, J. and Glimcher, L. H. 1998. Inhibitory function of two NFAT family members in lymphoid homeostasis and  $T_H2$  development. *Immunity* 9:627.
- 37 Kumagai, K., Ohno, I., Okada, S., Ohkawara, Y., Suzuki, K., Shinya, T., Nagase, H., Iwata, K. and Shirato, K. 1999. Inhibition of matrix metalloproteinases prevents allergen-induced airway inflammation in a murine model of asthma. *J. Immunol.* 162:4212.
- 38 Hirano, S., Nose, A., Hatta, K., Kawakami, A. and Takeichi, M. 1987. Calcium-dependent cell-cell adhesion molecules (cadherins): subclass specificities and possible involvement of actin bundles. *J. Cell Biol.* 105:2501.
- 39 Aberle, H., Schwartz, H. and Kemler, R. 1996. Cadherin-catenin complex: protein interactions and their implications for cadherin function. *J. Cell Biochem.* 61:514.
- 40 Fanger, C. M., Neben, A. L. and Cahalan, M. D. 2000. Differential  $Ca^{2+}$  influx, KCa channel activity, and  $Ca^{2+}$  clearance distinguish  $T_H1$  and  $T_H2$  lymphocytes. *J. Immunol.* 164:1153.
- 41 Mills, K. I., Walsh, V., Gilkes, A. F., Sweeney, M. C., Mirza, T., Woodgate, L. J., Brown, G. and Burnett, A. K. 2000. High FUS/TLS expression in acute myeloid leukaemia samples. *Br. J. Haematol.* 108:316.
- 42 Hicks, G. G., Singh, N., Nashabi, A., Mai, S., Bozek, G., Klewes, L., Arapovic, D., White, E. K., Koury, M. J., Oltz, E. M., Van Kaer, L. and Ruley, H. E. 2000. Fus deficiency in mice results in defective B-lymphocyte development and activation, high levels of chromosomal instability and perinatal death. *Nat. Genet.* 24:175.
- 43 Ewing, B. and Green, P. 2000. Analysis of expressed sequence tags indicates 35,000 human genes. *Nat. Genet.* 25:232.
- 44 Roest Crollius, H., Jaillon, O., Bernot, A., Dasilva, C., Bouneau, L., Fischer, C., Fizames, C., Wincker, P., Brottier, P., Quetier, F., Saurin, W. and Weissenbach, J. 2000. Estimate of human gene number provided by genome-wide analysis using tetraodon nigroviridis DNA sequence. *Nat. Genet.* 25:235.
- 45 Liang, F., Holt, I., Pertea, G., Karamycheva, S., Salzberg, S. L. and Quackenbush, J. 2000. Gene index analysis of the human genome estimates approximately 120,000 genes. *Nat. Genet.* 25:239.
